# Supplementary material for: Enhancing Cellular Uptake of Native Proteins through Bio-Orthogonal Conjugation with Chemically Synthesized Cell-Penetrating Peptides
Source: MDPI journal article supplement (doi:10.3390/pharmaceutics16050617), 2024-05-03
Supplement: s1 [file s1]

# SUPPLEMENTARY INFORMATION

Figure S1. Plasmids used in this work.

| Name                    | Backbone                                                 | Insert sequence                                                                                                                                                                                                                                                                                                                                                                                                                                                                                                                                                                                                                                                                                                                                                                                                                                                                                                                                                                                                                                                                                                                                                                                                                                                                                                                                                                                                                                                                |
|-------------------------|----------------------------------------------------------|--------------------------------------------------------------------------------------------------------------------------------------------------------------------------------------------------------------------------------------------------------------------------------------------------------------------------------------------------------------------------------------------------------------------------------------------------------------------------------------------------------------------------------------------------------------------------------------------------------------------------------------------------------------------------------------------------------------------------------------------------------------------------------------------------------------------------------------------------------------------------------------------------------------------------------------------------------------------------------------------------------------------------------------------------------------------------------------------------------------------------------------------------------------------------------------------------------------------------------------------------------------------------------------------------------------------------------------------------------------------------------------------------------------------------------------------------------------------------------|
| p_mCherry_EGFPn_inteinN | pEF1 $\alpha$ -mCherry-C1 (Clontech, Catalog No. 631972) | ATGGTGAGCAAGGGCGAGGAGGATAACATGGCCATCATCAAGGAGTTCATGCGCT<br>TCAAGGTGCACATGGAGGGCTCCGTGAACGGCCACGAGTTCGAGATCGAGGGCGA<br>GGGCGAGGGCCGCCCTACGAGGGCACCCAGACCGCCAAGCTGAAGGTGACCAA<br>GGGTGGCCCCCTGCCCTTCGCTGGGACATCCTGTCCCTCAGTTCATGTACGGCTC<br>CAAGGCCTACGTGAAGCACCCCGCCGACATCCCCGACTACTTGAAGCTGCCTTCC<br>CCGAGGGCTTCAAGTGGGAGCGCGTGATGAACTTCGAGGACGGCGCGGTGGTGAC<br>CGTGACCCAGGACTCCTCCCTGCAGGACGGCGAGTTCATCTACAAGGTGAAGCTGC<br>GCGGCACCAACTTCCCTCCGACGGCCCCGTAATGCAGAAGAAGACCATGGGCTG<br>GGAGGCCTCCTCCGAGCGGATGTACCCGAGGACGGCGCCCTGAAGGGCGAGATC<br>AAGCAGAGGCTGAAGCTGAAGGACGGCGGCCACTACGACGCTGAGGTCAAGACC<br>ACCTACAAGGCCAAGAAGCCCGTGAGCTGCCCGGCGCTACAACGTCAACATCA<br>AGTTGGACATCACCTCCACACAACGAGGACTACACCATCGTGAACAGTACGAACG<br>CGCCGAGGGCCGCCACTCCACCGCGGCATGGACGAGCTGTACAAGTCCGAGCG<br>GGCAGCGCGGCGGCAGCGGCGAATTTCTGGCAGCATGAGCAAAGGAGAAGAA<br>CTGTTTACCGAGTGGTGCCAATTCTCGTGGAACTGGATGGCGATGTTAATGGGCA<br>CAAATTTCTGTGAGAGGAGAAGGTGAAGGTGATGCCACAATTGAAAGCTCACT<br>CTGAAATTCATCTGCACCACTGGAAAACCTCCCTGTGCCATGGCCAACACTGGTCAC<br>TACCTTAACCTACGGCGTGAGTGCTTTTCAAGATATCCAGATCATATGAAAAGGC<br>ATGACTTTTCAAATCAGCAATGCCCGAGGGGTATGTGCAGGAGCGAACGATTCT<br>TTCAAAGATGATGGGAAATACAAGACCCGCGCTGTTGTTAAGTTGAAGGAGACG<br>ATAAAGGCATTGAATGCAGCGTGTTAGCATTGATAGCAACGGCATTGTGTATACC<br>CAGCCGATTGCGCAGTGGCATCATCGCGGCAAACAGGAAGTGTTGAATATTGCTT<br>GGAAGATGGCAGCATTATTAAGCGACCAAAGATCATAAATTTATGACCCAGGAT<br>GGCAAAATGCTGCCGATTGATGAAATTTTGAACAGGAAGTGGATCTGCTGCAGGT<br>GAAAGGCCTGCCGGAATAAG |
| p_inteinC_EGFPC_SBF     | pCMV-GFP (Addgene #11153)                                | ATGGTGAGCAAGGGCGAGGAGGATAACATGGCCATCATCAAGGAGTTCATGCGCT<br>TCAAGGTGCACATGGAGGGCTCCGTGAACGGCCACGAGTTCGAGATCGAGGGCGA<br>GGGCGAGGGCCGCCCTACGAGGGCACCCAGACCGCCAAGCTGAAGGTGACCAA<br>GGGTGGCCCCCTGCCCTTCGCTGGGACATCCTGTCCCTCAGTTCATGTACGGCTC<br>CAAGGCCTACGTGAAGCACCCCGCCGACATCCCCGACTACTTGAAGCTGCCTTCC<br>CCGAGGGCTTCAAGTGGGAGCGCGTGATGAACTTCGAGGACGGCGCGGTGGTGAC<br>CGTGACCCAGGACTCCTCCCTGCAGGACGGCGAGTTCATCTACAAGGTGAAGCTGC<br>GCGGCACCAACTTCCCTCCGACGGCCCCGTAATGCAGAAGAAGACCATGGGCTG<br>GGAGGCCTCCTCCGAGCGGATGTACCCGAGGACGGCGCCCTGAAGGGCGAGATC<br>AAGCAGAGGCTGAAGCTGAAGGACGGCGGCCACTACGACGCTGAGGTCAAGACC<br>ACCTACAAGGCCAAGAAGCCCGTGAGCTGCCCGGCGCTACAACGTCAACATCA<br>AGTTGGACATCACCTCCACACAACGAGGACTACACCATCGTGAACAGTACGAACG<br>CGCCGAGGGCCGCCACTCCACCGCGGCATGGACGAGCTGTACAAGTCCGAGCG<br>GGCAGCGCGGCGGCAGCGGCGAATTTCTGGCAGCATGAGCAAAGGAGAAGAA<br>CTGTTTACCGAGTGGTGCCAATTCTCGTGGAACTGGATGGCGATGTTAATGGGCA<br>CAAATTTCTGTGAGAGGAGAAGGTGAAGGTGATGCCACAATTGAAAGCTCACT<br>CTGAAATTCATCTGCACCACTGGAAAACCTCCCTGTGCCATGGCCAACACTGGTCAC<br>TACCTTAACCTACGGCGTGAGTGCTTTTCAAGATATCCAGATCATATGAAAAGGC<br>ATGACTTTTCAAATCAGCAATGCCCGAGGGGTATGTGCAGGAGCGAACGATTCT<br>TTCAAAGATGATGGGAAATACAAGACCCGCGCTGTTGTTAAGTTGAAGGAGACG                                                                                                                                                                                                                                                                    |

|                               |                                                                |                                                                                                                                                                                                                                                                                                                                                                                                                                                                                                                                                                                                                                                                                                                                                                                                                                                                                                                                                                                                                                                                                                                                                                                                                                                                                                                                                                                                                                                                                                                                                                                                                                                                                                                                                                                                                                              |
|-------------------------------|----------------------------------------------------------------|----------------------------------------------------------------------------------------------------------------------------------------------------------------------------------------------------------------------------------------------------------------------------------------------------------------------------------------------------------------------------------------------------------------------------------------------------------------------------------------------------------------------------------------------------------------------------------------------------------------------------------------------------------------------------------------------------------------------------------------------------------------------------------------------------------------------------------------------------------------------------------------------------------------------------------------------------------------------------------------------------------------------------------------------------------------------------------------------------------------------------------------------------------------------------------------------------------------------------------------------------------------------------------------------------------------------------------------------------------------------------------------------------------------------------------------------------------------------------------------------------------------------------------------------------------------------------------------------------------------------------------------------------------------------------------------------------------------------------------------------------------------------------------------------------------------------------------------------|
| p_mCherry_10_inteinN          | pEF1 $\alpha$ -mCherry-C1<br>(Clontech,<br>Catalog No. 631972) | <p>ATAAAGGCATTGAATGCAGCGTGTTAGCATTGATAGCAACGGCATTGTGTATACC<br/>CAGCCGATTGCGCAGTGGCATCATCGCGGCAAACAGGAAGTGTTGAATATTGCCT<br/>GGAAGATGGCAGCATTATTAAGCGACCAAAGATCATAAATTTATGACCCAGGAT<br/>GGCAAAATGCTGCCGATTGATGAAATTTTGAACAGGAACGGATCTGCTGCAGGT<br/>GAAAGGCCTGCCGGAATAAG</p>                                                                                                                                                                                                                                                                                                                                                                                                                                                                                                                                                                                                                                                                                                                                                                                                                                                                                                                                                                                                                                                                                                                                                                                                                                                                                                                                                                                                                                                                                                                                                                    |
|                               |                                                                | <p>ATGGTGAGCAAGGGCGAGGAGGATAACATGGCCATCATCAAGGAGTTCATGCGCT<br/>TCAAGGTGCACATGGAGGGCTCCGTGAACGGCCACGAGTTCGAGATCGAGGGCGA<br/>GGGCGAGGGCCGCCCTACGAGGGCACCCAGACGCCAAGCTGAAGGTGACCAA<br/>GGGTGGCCCCCTGCCCTTCGCTGGGACATCCTGTCCCCTCAGTTCATGTACGGCTC<br/>CAAGGCCTACGTGAAGCACCCCGCCGACATCCCCGACTACTTGAAGCTGCCTTCC<br/>CCGAGGGCTTCAAGTGGGAGCGCGTGATGAACTTCGAGGACGGCGCGGTGGTGAC<br/>CGTGACCCAGGACTCTCCCTGCAGGACGGCGAGTTCATCTACAAGGTGAAGCTGC<br/>GCGGCACCAACTTCCCTCCGACGGCCCCGTAATGCAGAAGAAGACCATGGGCTG<br/>GGAGGCCTCTCCGAGCGGATGTACCCCGAGGACGGCGCCCTGAAGGGCGAGATC<br/>AAGCAGAGGCTGAAGCTGAAGGACGGCGGCCACTACGACGCTGAGGTCAAGACC<br/>ACCTACAAGGCCAAGAAGCCCGTGACGTGCCCGGCCCTACAACGTCAACATCA<br/>AGTTGGACATCACCTCCACAAACGAGGACTACACCATCGTGAACAGTACGAAACG<br/>CGCCGAGGGCCGCCACTCCACCGCGCGCATGGACGAGCTGTACAAGTCCGGAGCG<br/>GGCAGCGCGGCGGGCAGCGGCGAATTCCTGGCAGCATGAGCAAAGGAGAAGAA<br/>CTGTTTACCGGAGTGGTGCCAATTCTCGTGAAGTGGATGGCGATGTTAATGGGCA<br/>CAAATTTCTGTGACAGGAGAAGGTGAAGGTGATGCCACAATTGGAAAGCTCACT<br/>CTGAAATTCATCTGCACCACTGGAAAACCTCCCTGTGCCATGGCCAACTGCTCAC<br/>TACCTTAACCTACGGCGTGCACTGCTTTTCAAGATATCCAGATCATATGAAAAGGC<br/>ATGACTTTTTCAAATCAGCAATGCCCGAGGGGTATGTGCAGGAGCGAACGATTCT<br/>TTCAAAGATGATGGGAAATACAAGACCCGCGCTGTTGTTAAGTTGAAGGAGACA<br/>CACTGGTGAATCGTATCGAGTTGAAGGGGACAGACTTTAAGGAAGACGGAAATAT<br/>TCTCGGGCACAAGCTGGAATACAACCTTAATAGTCACAATGTGTATATCACAGCGG<br/>ACAAGCAAAAAGATGGTATCAAAGCAAACCTTCACAGTCAGACACAACGTGCAAG<br/>ATGGAAGCGTTCAGCTGGCCGACCATTATCAACAGAACACTCCAATCGGGGACGG<br/>CCCTGTGCTCCTCCAGACAACCATTACCTGTCAACCCAGACTGTCCTAAGTAAAG<br/>ATCCAAATGAAAAAGATAAAGGCATTGAATGCAGCGTGTTAGCATTGATAGCAA<br/>CGGCATTGTGTATACCCAGCCGATTGCGCAGTGGCATCATCGCGGCAACAGGAA<br/>GTGTTTGAATATTGCCTGGAAGATGGCAGCATTATTAAGCGACCAAAGATCATAA<br/>ATTTATGACCCAGGATGGCAAAATGCTGCCGATTGATGAAATTTTGAACAGGAAC<br/>TGGATCTGCTGCAGGTGAAAGGCCTGCCGGAATAAG</p> |
| p_inteinC_E<br>GFP11_SBF<br>P | pCMV-GFP<br>#11153) (Addgene                                   | <p>ATGATTAATAATTGCGACCCGCAAATATCTGGGCAAACAGAACGTGTATGATATTGG<br/>CGTGGAACGCGATCATAACTTTGCGCTGAAAAACGGCTTTATTGCGAGCAACTGCT<br/>TTAACAAACGGGACCACATGGTGTGCACGAGTACGTGAACGCCGCCGGCATCAC<br/>AGGCAGCGCGGGCAGCGCGCGGGCAGCGCGCAATTTATGGTGAGCAAAGGCGA<br/>AGAACTGTTTACCGCGTGGTGCCGATTCTGGTGAAGTGGATGGCGATGTGAACG<br/>GCCATAAATTTAGCGTGAGCGGCGAAGGCGAAGGCGATGCGACCTATGGCAAACCT<br/>GACCCTGAAATTTATTTGCACCACCGGCAAACCTGCCGGTGCCGTGGCCGACCCTGG<br/>TGACCACCTGAGCCATGGCGTGCACTGCTTTGCGCGCTATCCGGATCATATGAAA<br/>CAGCATGATTTTTTAAAAAGCGCGATGCCGGAAGGCTATGTGCAGGAACGCACCAT<br/>TTTTTTAAAGATGATGGCAACTATAAAACCCGCGCGGAAGTGAAATTTGAAGGCG<br/>ATACCCTGGTGAACCGCATTGAACTGAAAGGCATTGATTTTAAAGAAGATGGCAA<br/>CATTCTGGGCCATAAACTGGAATATACTTTAACAGCCATAACGTGTATATTACCG<br/>CGGATAAACAGAAAAACGGCATTAAAGCGAACTTTAAAATTCGCCATAACATTGA<br/>AGATGGCGCGCTGCAGCTGGCGGATCATTATCAGCAGAACACCCCGATTGGCGAT<br/>GGCCCGGTGCTGCTGCCGATAACCATTATCTGAGACCCAGAGCAAACCTGAGCA<br/>AAGATCCGAACGAAAAACGCGATCATATGGTGTCTGGAATTTGTGACCGCGGC<br/>GGGCATTACCCTGGGCATGGATGAACTGTATAAAGAATTCATCATCATCATCATC<br/>ATATGTAAT</p>                                                                                                                                                                                                                                                                                                                                                                                                                                                                                                                                                                                                                                                                                                                                                                 |

---

|                    |                     |          |                                                                                                                                                                                                                                                                                                                                                                                                                                                                                                                                                                                                                                                                                                                                                                                                                                                                                                                                                                                                                                                                                                                                         |
|--------------------|---------------------|----------|-----------------------------------------------------------------------------------------------------------------------------------------------------------------------------------------------------------------------------------------------------------------------------------------------------------------------------------------------------------------------------------------------------------------------------------------------------------------------------------------------------------------------------------------------------------------------------------------------------------------------------------------------------------------------------------------------------------------------------------------------------------------------------------------------------------------------------------------------------------------------------------------------------------------------------------------------------------------------------------------------------------------------------------------------------------------------------------------------------------------------------------------|
| p_EGFP_int<br>einN | pCMV-GFP<br>#11153) | (Addgene | ATGCATCATCATCATCATCACGTGAGCAAGGGCGAGGAGCTGTTACCGGGGTGGT<br>GCCCATCCTGGTCGAGCTGGACGGCGACGTAAACGGCCACAAGTTCAGCGTGTCC<br>GGCGAGGGCGAGGGCGATGCCACCTACGGCAAGCTGACCCTGAAGTTCATCTGCA<br>CCACCGGCAAGCTGCCCGTGCCCTGGCCACCCCTCGTGACCACCCCTGACCTACGGC<br>GTGCAGTGCTTCAGCCGCTACCCCGACCACATGAAGCAGCACGACTTCTTCAAGTC<br>CGCCATGCCCGAAGGCTACGTCCAGGAGCGCACCATCTTCTTCAAGGACGACGGC<br>AACTACAAGACCCGCGCCGAGGTGAAGTTCGAGGGCGACACCCTGGTGAACCGCA<br>TCGAGCTGAAGGGCATCGACTTCAAGGAGGACGGCAACATCCTGGGGCACAAGCT<br>GGAGTACAACACTACAACAGCCACAACGTCTATATCATGGCCGACAAGCAGAAGAAC<br>GGCATCAAGGTGAACCTCAAGATCCGCCACAACATCGAGGACGGCAGCGTGCAGC<br>TCGCCGACCACTACCAGCAGAACACCCCCATCGGCGACGGCCCCGTGCTGCTGCC<br>CGACAACCACTACCTGAGCACCCAGTCCGCCCTGAGCAAAGACCCCAACGAGAAG<br>CGCGATCACATGGTCCTGCTGGAGTTCGTGACCGCCGCCGGGATCACTCTCGGCAT<br>GGACGAGCTGTACAAGAGATCTCGAGCTCAAGCTTCAATTCTGCAGTCGACGGTA<br>CCGCGGGCGATAAAGGCATTGAATGCAGCGTGTTTAGCATTGATAGCAACGGCATT<br>GTGTATACCCAGCCGATTGCGCAGTGGCATCATCGCGCAAACAGGAAGTGTGTA<br>ATATTGCCTGGAAGATGGCAGCATTATTAAAGCGACCAAAGATCATAAATTTATGA<br>CCCAGGATGGCAAAATGCTGCCGATTGATGAAATTTTGAACAGGAAGTGGATCTG<br>CTGCAGGTGAAAGGCCTGCCGAATAA |
|--------------------|---------------------|----------|-----------------------------------------------------------------------------------------------------------------------------------------------------------------------------------------------------------------------------------------------------------------------------------------------------------------------------------------------------------------------------------------------------------------------------------------------------------------------------------------------------------------------------------------------------------------------------------------------------------------------------------------------------------------------------------------------------------------------------------------------------------------------------------------------------------------------------------------------------------------------------------------------------------------------------------------------------------------------------------------------------------------------------------------------------------------------------------------------------------------------------------------|

---

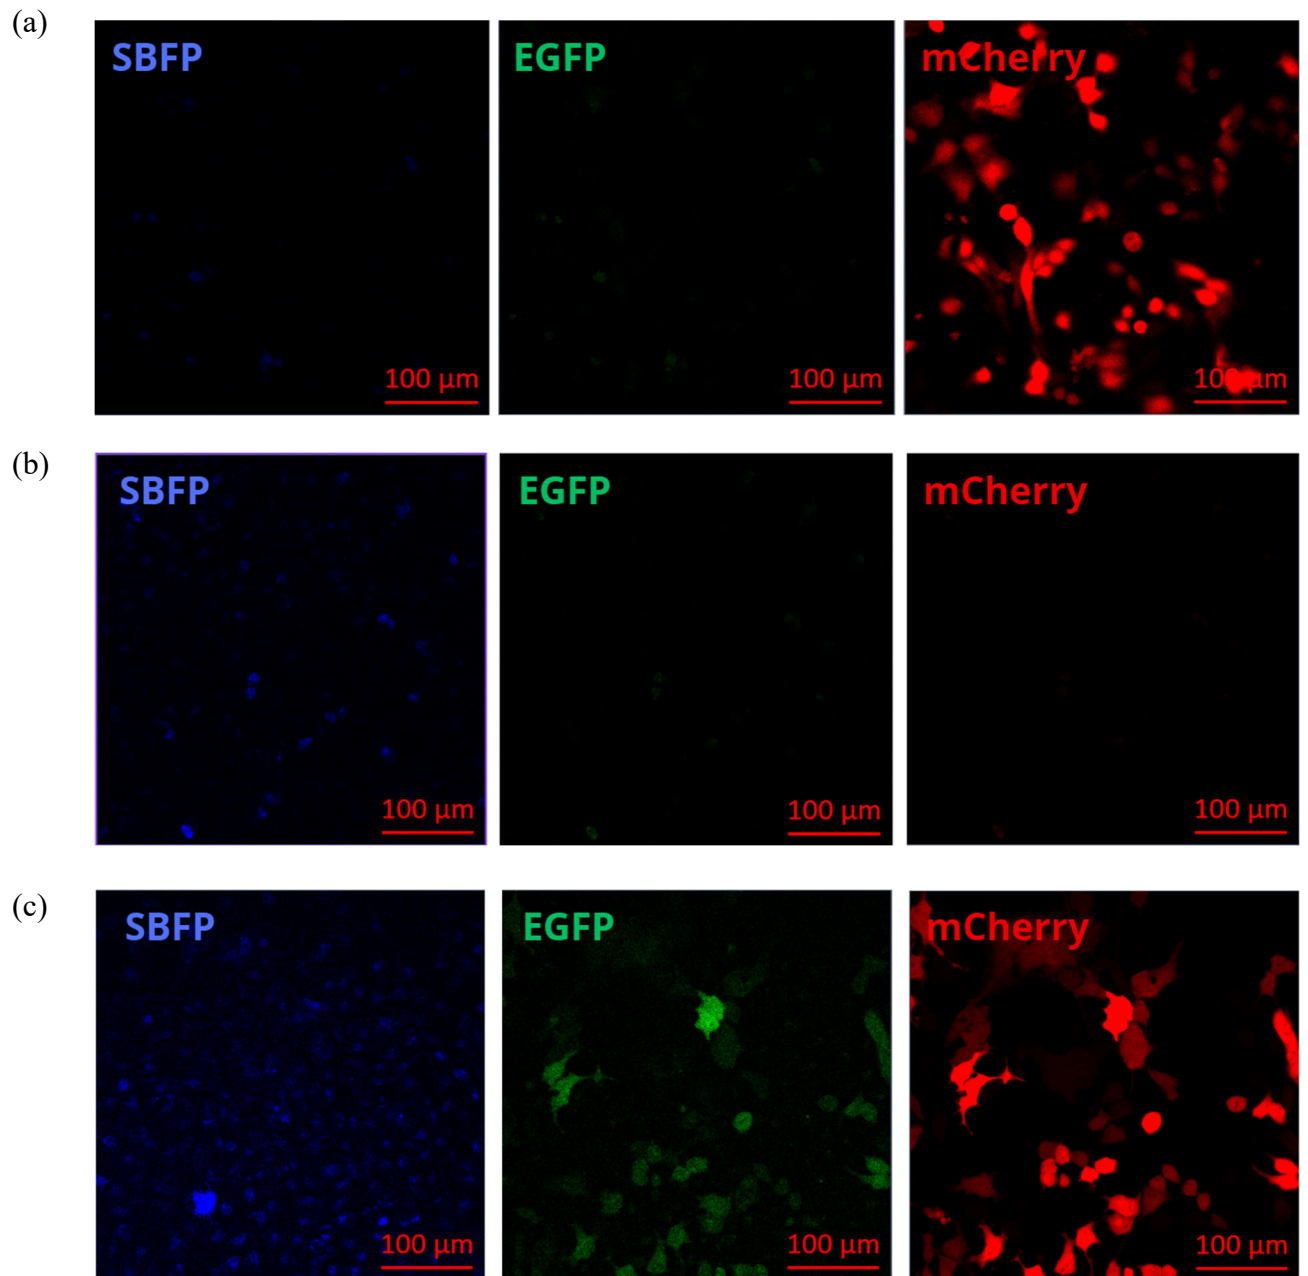

Figure S2. Representative confocal images of HeLa cells treated either with (a) p\_egfp1-10\_inteinN, (b) p\_inteinC\_egfp11, or (c) both plasmids simultaneously.

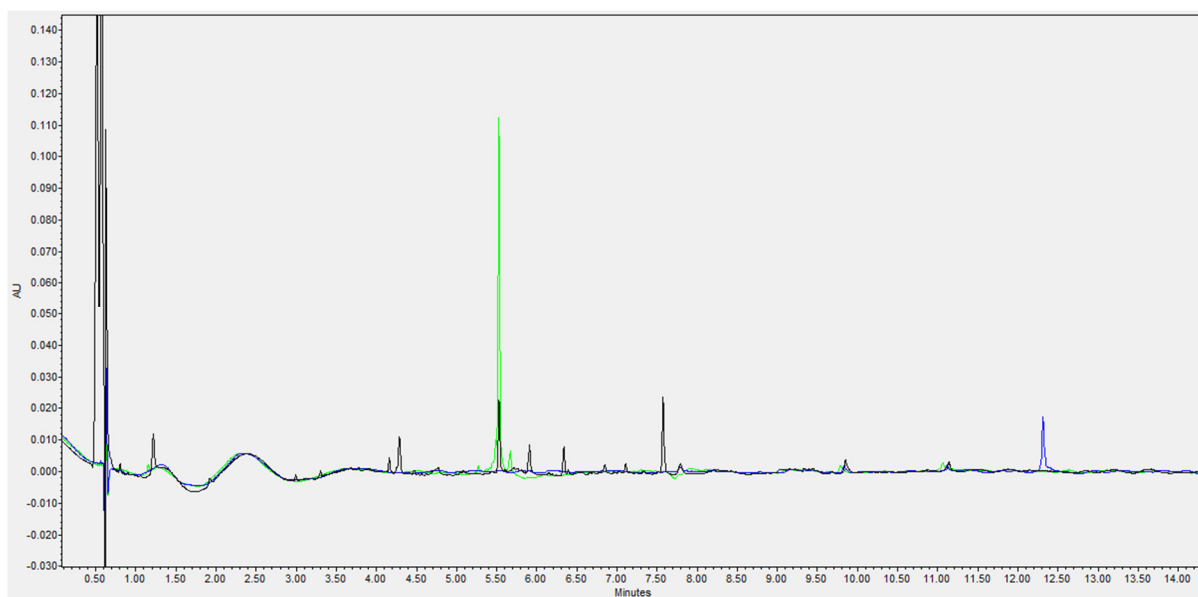

Figure S3. UPLC image. The green line is the intein<sup>C</sup> peptide, the blue line is the NF55-XK(Rhod)XPra peptide, and the black line is the purified click reaction mixture. Note the reduction in the amount of intein<sup>C</sup>, which was initially in excess compared to NF55-XK(Rhod)XPra, and the disappearance of NF55-XK(Rhod)XPra from the reaction mixture. Furthermore, the emergence of a new compound (NF55-XK(Rhod)X–intein<sup>C</sup> conjugate) can be observed.

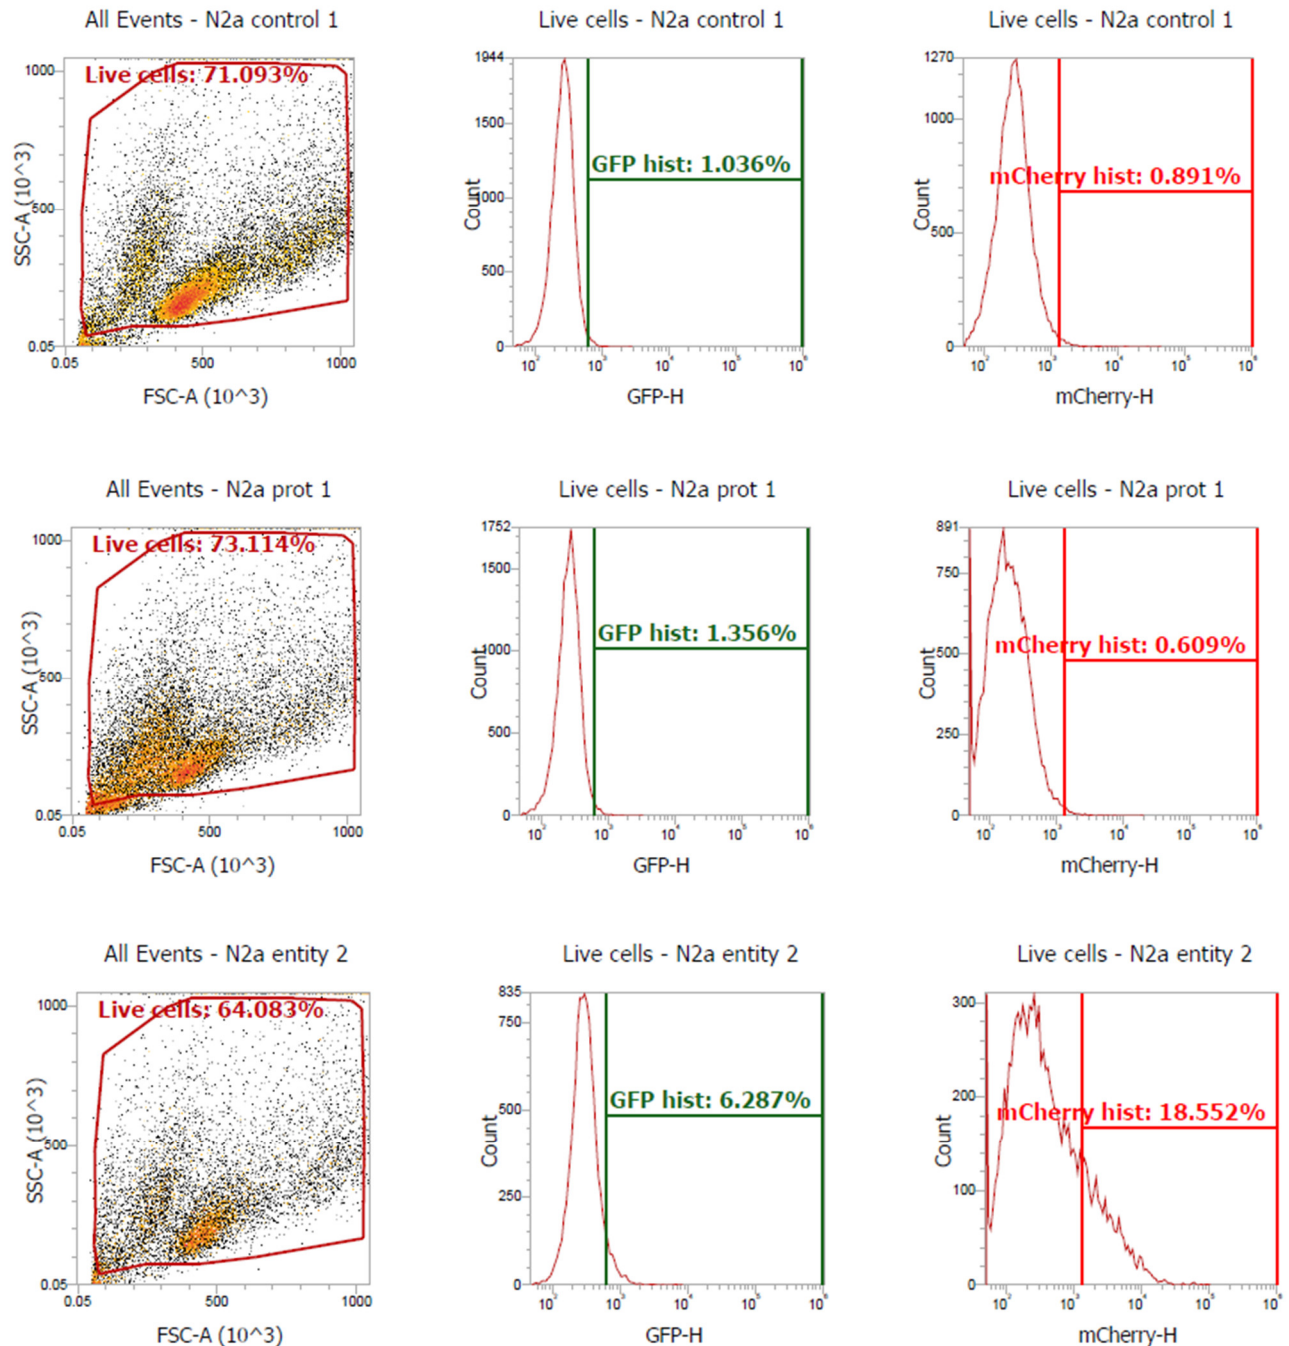

Figure S4. Representative flow cytometry plots of Neuro 2a cells transduction efficacy assay. Flow cytometry was performed using an Attune™ NxT Flow Cytometer equipped with a 488 nm argon laser. The viable cell population was determined from a plot of forward-scattered (FSC) vs. side-scattered (SSC) light. Attune™ NxT Software 3.2.1 software was used to analyze a minimum of 10,000 events per sample. The area scaling factor was 1.28, with a threshold of SSC 0.3, FSC 220, SSC 360, BL1/GFP 460, and RL1/APC/Cy5 520. GFP+ and mCherry show gated events with a signal intensity over the threshold of ~1% of untreated cells.

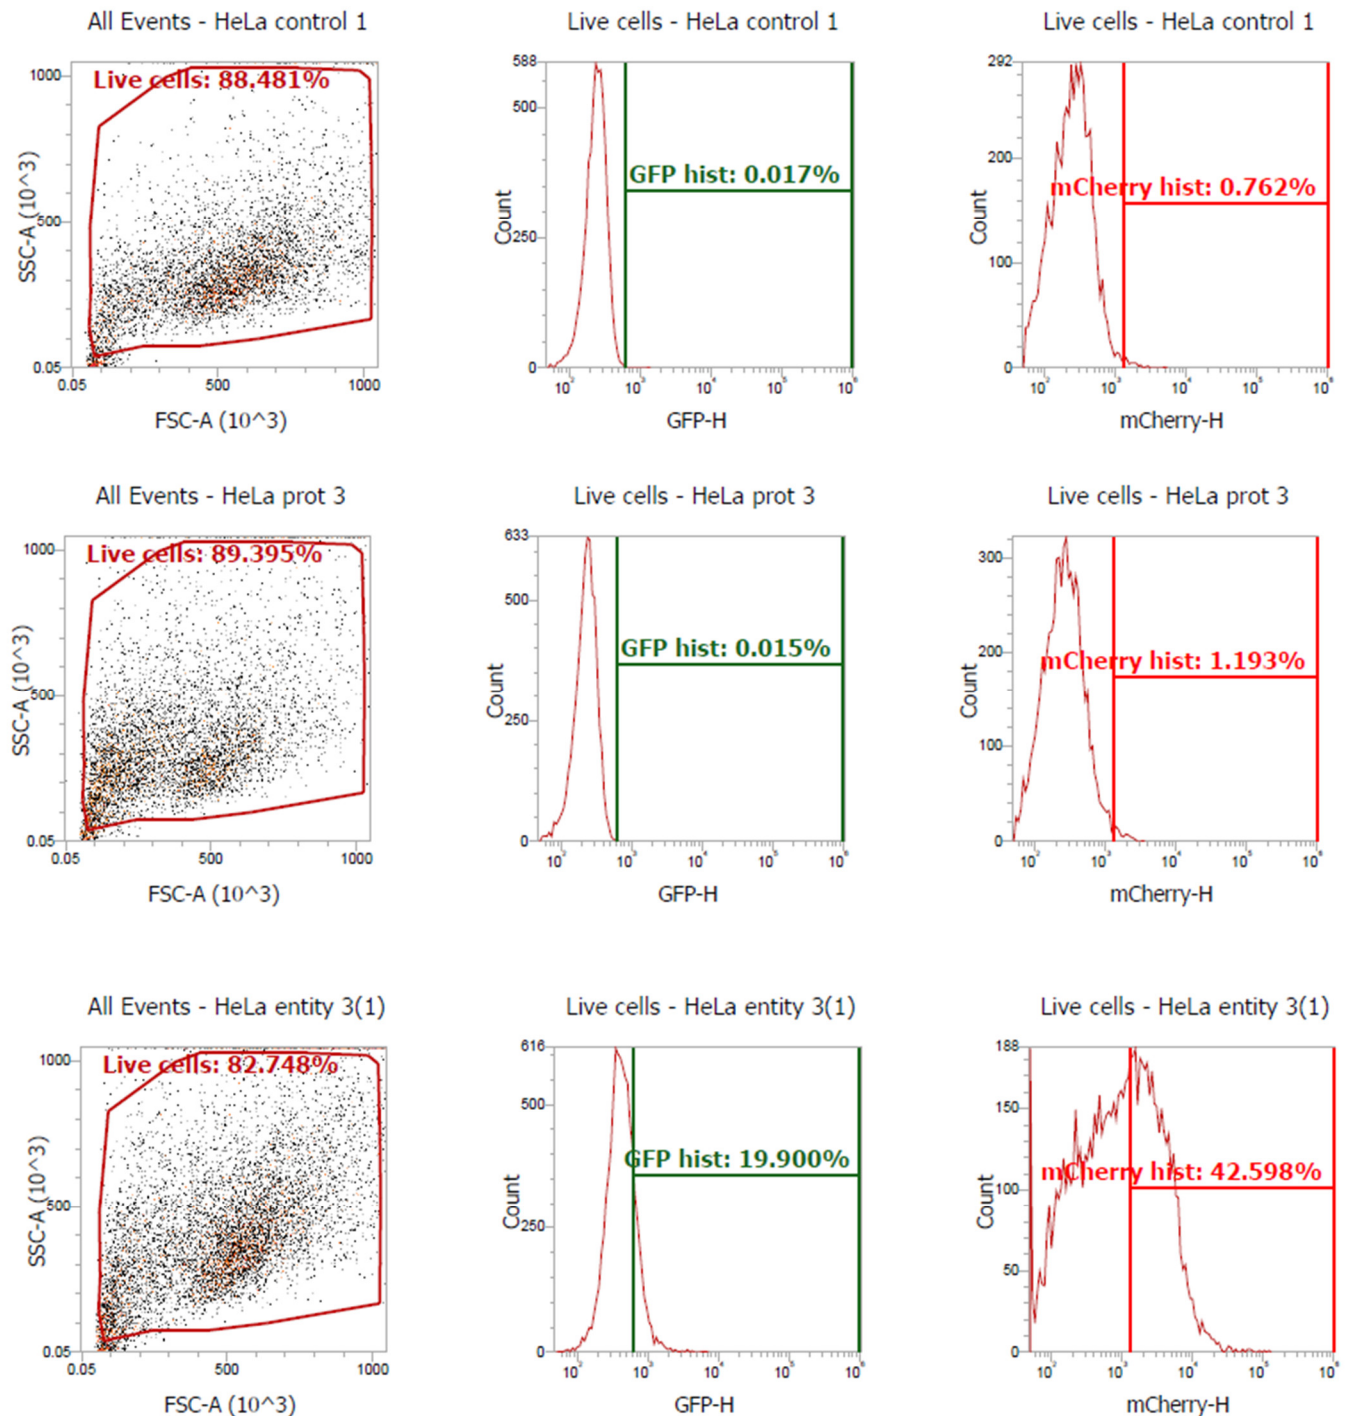

Figure S5. Representative flow cytometry plots of HeLa cells transduction efficacy assay. Flow cytometry was performed using an Attune™ NxT Flow Cytometer equipped with a 488 nm argon laser. The viable cell population was determined from a plot of forward-scattered (FSC) vs. side-scattered (SSC) light. Attune™ NxT Software 3.2.1 software was used to analyze a minimum of 10,000 events per sample. The area scaling factor was 1.28, with a threshold of SSC 0.3, FSC 220, SSC 360, BL1/GFP 460, and RL1/APC/Cy5 520. GFP+ and mCherry show gated events with signal a intensity over the threshold of ~1% of untreated cells.

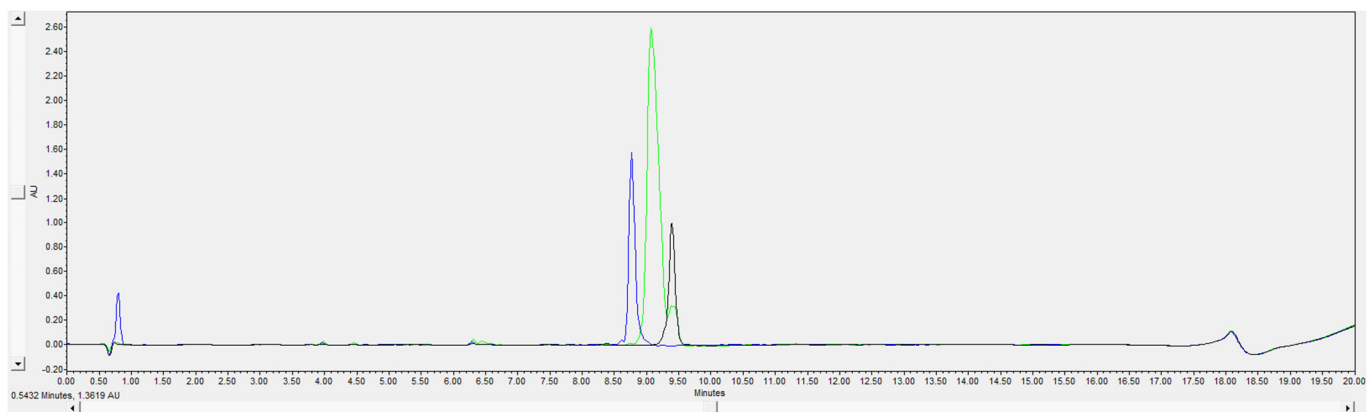

Figure S6. UPLC image. The blue line is the EGFP–intein<sup>N</sup> protein, the green line is the reaction mixture of EGFP–intein<sup>N</sup> protein and intein<sup>C</sup>-activated NF55 peptide, and the black line is the intein<sup>C</sup>-activated NF55 peptide. In the reaction mixture, no protein or peptide peaks are registered.

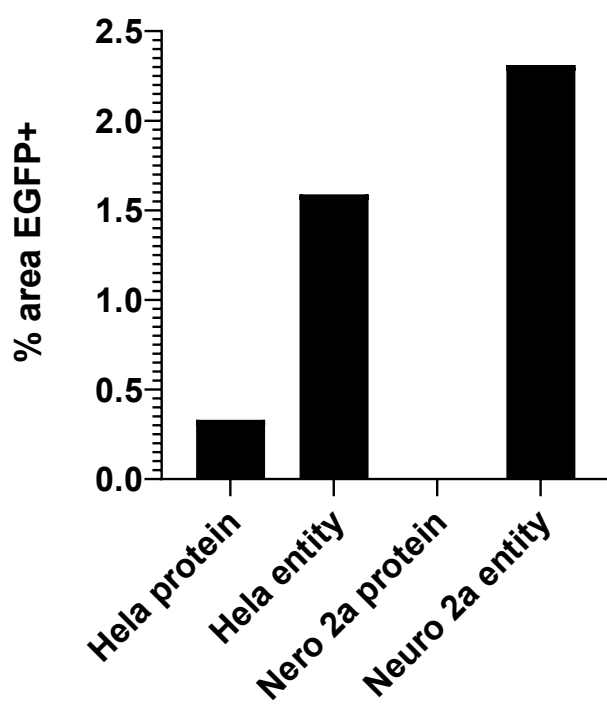



Figure S7. Confocal image analysis showing average percentage of EGFP-positive area. Analysis is performed with ImageJ (Version 1.53a), National Institute of Health, Bethesda, Maryland, USA.
